# Supplementary material for: Valproic acid analysis by mass spectrometry part I: enhanced determination of valproic acid by microwave assisted chemical labeling
Source: Royal Society of Chemistry journal article supplement (doi:10.1039/c5ra25416g), 2016-01-01
Supplement: c5ra25416g1.pdf [file c5ra25416g1.pdf]

## Valproic acid analysis by mass spectrometry part I: Enhanced determination of valproic acid by microwave assisted chemical labeling

### Supporting Information

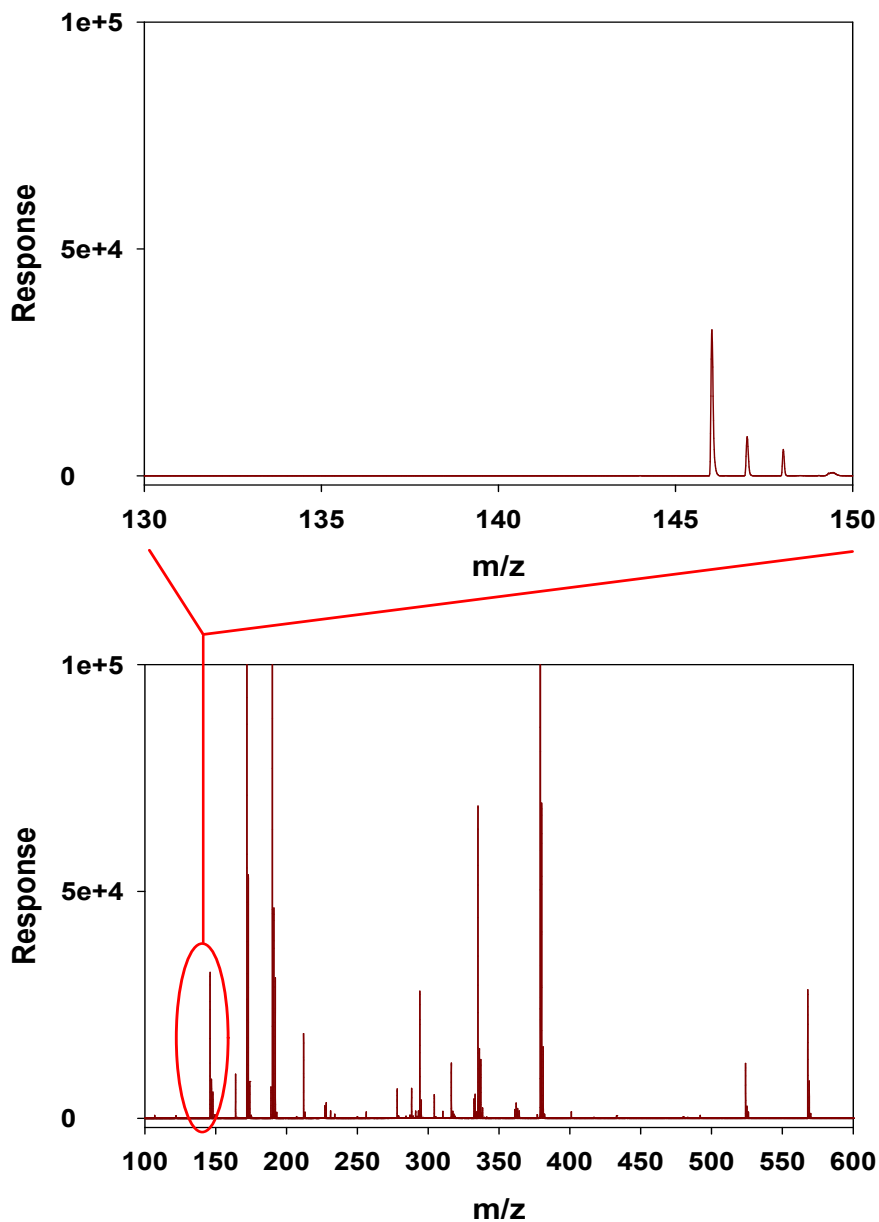

**Figure S1.** Mass spectra for MALDI-TOF MS of VA 1000  $\mu$ M and no significant signals or matrix ion clusters were detected at  $[M+H]^+$  145.

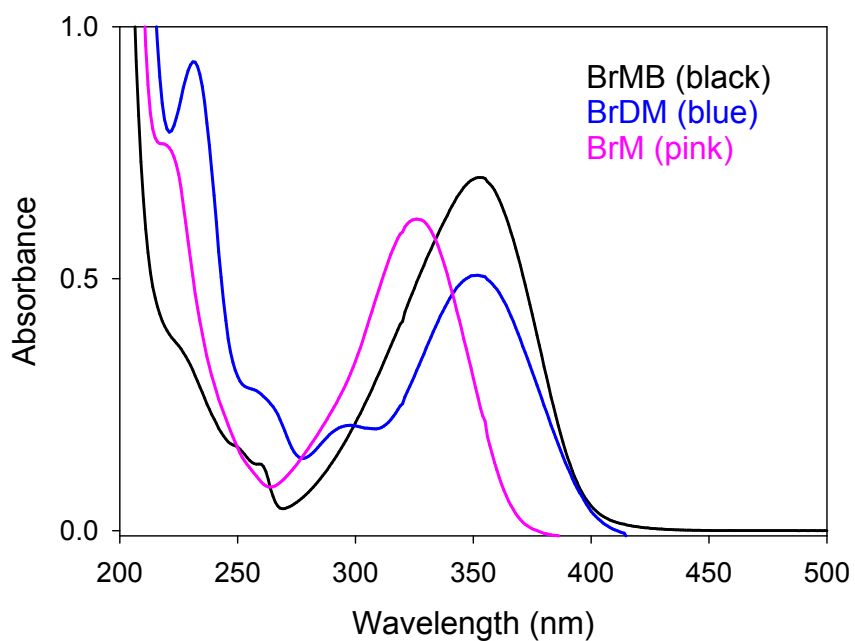

**Figure S2.** Maximum absorbent wavelength ( $\lambda_{\max}$ ) of three derivatization reagents, BrM, BrDM and BrMB.

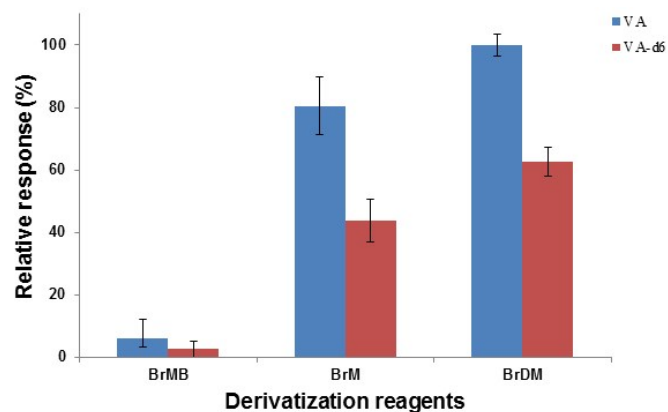

**Figure S3.** Effects of different derivatization reagents on the formation of VA and VA-d6 derivatives.

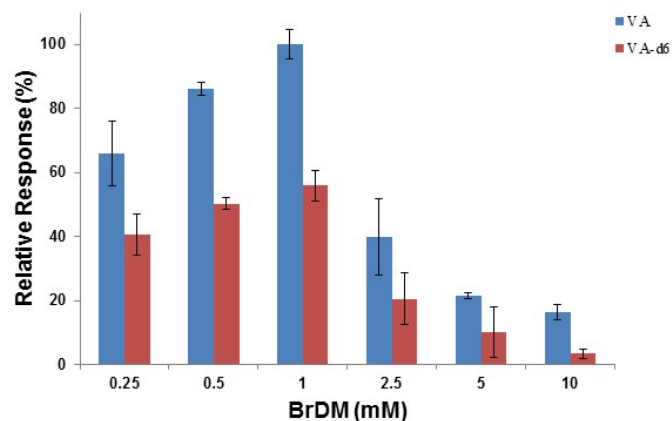

**Figure S4.** Effects of varying concentrations (0.25-10 mM) of BrDM on the formation of VA and VA-d6 derivatives.

Figure S5 shows that comparisons of varying quantities of 18-crown-6 (0-10 mM) revealed that 10 mM was optimal.

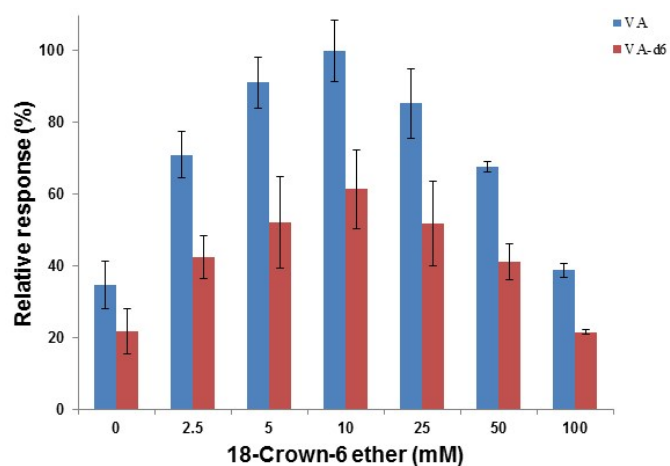

**Figure S5.** Effects of varying concentrations (0-100 mM) of catalyst 18-crown-6 on the formation of VA and VA-d6 derivatives.

Figure S6 shows that comparisons of three different potassium bases, (KOH,  $\text{KHCO}_3$  and  $\text{K}_2\text{CO}_3$ , 2 mg ea) revealed that  $\text{K}_2\text{CO}_3$  was the best basic activator.

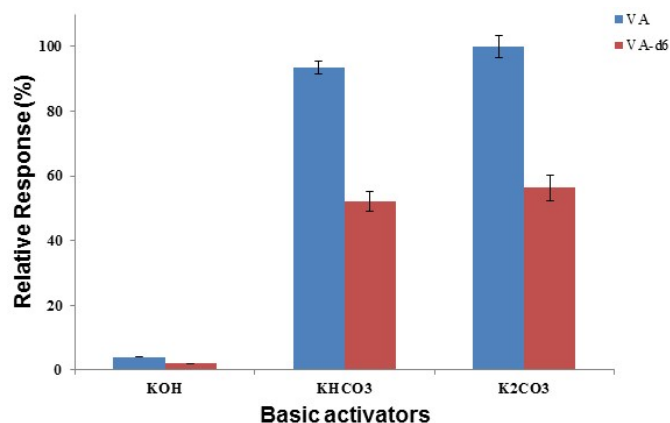

**Figure S6.** Effects of different basic activators (KOH,  $\text{KHCO}_3$  and  $\text{K}_2\text{CO}_3$ ) on the formation of VA and VA-d6 derivatives.

Figure S7 shows that comparisons of varying quantities of  $\text{K}_2\text{CO}_3$  (0.5-6 mg) revealed that 2 mg was optimal.

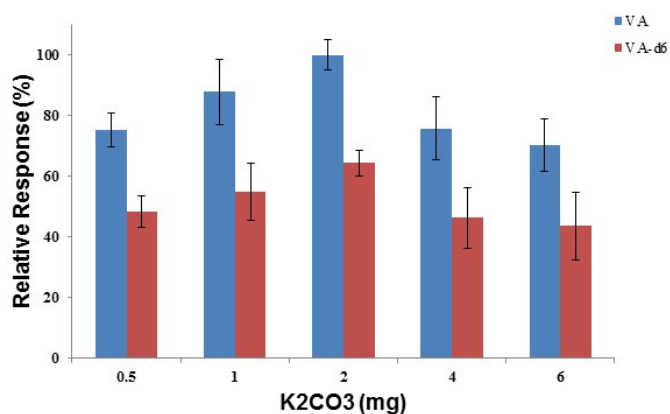

**Figure S7.** Effects of varying quantities (0.5-6 mg) of  $\text{K}_2\text{CO}_3$  on the formation of VA and VA-d6 derivatives.

Figure S8 shows that comparisons of three different reaction solvents (toluene, acetone and acetonitrile) revealed that acetonitrile was optimal.

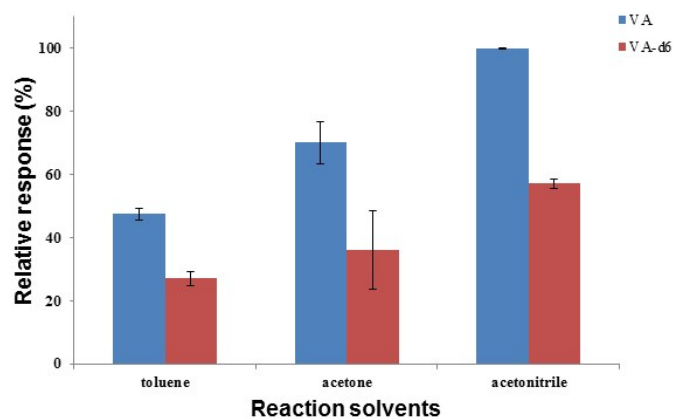

**Figure S8.** Effects of different reaction solvents (toluene, acetone and acetonitrile) on the formation of VA and VA-d6 derivatives.

Figure S9 shows that comparisons of varying microwave power (200-1100 W) revealed that 300 W was optimal.

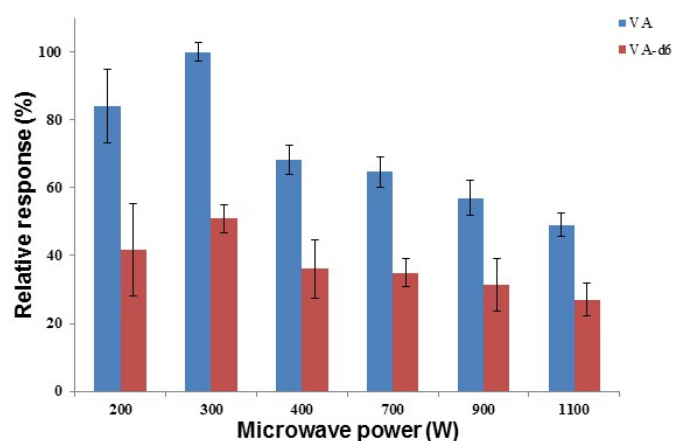

**Figure S9.** Effects of varying microwave power (200-1100 W) on the formation of VA and VA-d6 derivatives.

Figure S10 shows that comparisons of varying radiation times (2-10 min) revealed that 6 min was optimal.

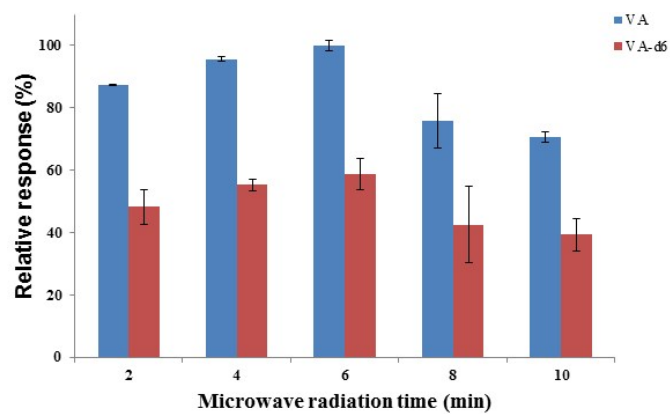

**Figure S10.** Effects of different microwave radiation times (2-10 min) on the formation of VA and VA-d6 derivatives.

**Table S1. Assay results for valproic acid (VA) tablets**

| Tablet No. | Average weight (mg) <sup>a</sup> | Assay(%) <sup>b</sup> |
|------------|----------------------------------|-----------------------|
| 1          | 145.92±2.01                      | 100.63±1.39           |
| 2          | 143.97±8.74                      | 99.29±6.03            |
| 3          | 150.07±5.42                      | 107.47±1.53           |
| 4          | 150.55±1.22                      | 104.97±0.23           |
| 5          | 148.46±2.43                      | 102.39±1.68           |
| 6          | 144.67±1.83                      | 99.77±1.26            |
| 7          | 151.53±4.00                      | 104.50±2.76           |
| 8          | 149.49±0.97                      | 103.09±0.67           |
| 9          | 152.90±1.85                      | 105.45±1.27           |
| 10         | 147.53±2.44                      | 101.74±1.68           |
| Limit      | 145±14.50                        | 90-110%               |

<sup>a</sup> average weight : mean weight ± SD

<sup>b</sup> assay(%) : recovery ± recovery SD

**Table S2. Uniformity analysis results for valproic acid (VA) tablets**

| Tablet | Uniformity content<br>(mg) |      |            | Uniformity content<br>(%) |                | Uniformity content<br>range |        |
|--------|----------------------------|------|------------|---------------------------|----------------|-----------------------------|--------|
|        | VA<br>(mg)                 | SD   | RSD<br>(%) | Recovery                  | Recovery<br>SD | Higher                      | Lower  |
| 1      | 148.54                     | 2.90 | 1.95       | 102.44                    | 2.00           | 150.64                      | 145.22 |
| 2      | 148.59                     | 2.56 | 1.72       | 102.47                    | 1.77           | 151.12                      | 145.99 |
| 3      | 148.80                     | 3.59 | 2.41       | 102.62                    | 2.48           | 151.22                      | 144.68 |
| 4      | 149.83                     | 0.73 | 0.49       | 103.33                    | 0.51           | 150.68                      | 149.37 |
| 5      | 151.16                     | 0.92 | 0.61       | 104.25                    | 0.63           | 152.20                      | 150.48 |
| 6      | 150.29                     | 0.94 | 0.63       | 103.65                    | 0.65           | 151.14                      | 149.29 |
| 7      | 149.80                     | 3.72 | 2.48       | 103.31                    | 2.57           | 152.25                      | 145.51 |
| 8      | 152.92                     | 7.25 | 4.74       | 105.46                    | 5.00           | 160.91                      | 146.75 |
| 9      | 148.58                     | 4.58 | 3.08       | 102.47                    | 3.16           | 151.56                      | 143.31 |
| 10     | 151.10                     | 1.95 | 1.29       | 104.20                    | 1.34           | 152.57                      | 148.89 |
